# Supplementary material for: Baseline BMI and BMI variation during first line pembrolizumab in NSCLC patients with a PD-L1 expression ≥ 50%: a multicenter study with external validation
Source: PubMed Central journal article supplement — J Immunother Cancer. 2020 Oct 19;8(2):e001403. doi: 10.1136/jitc-2020-001403 (PMC7574933; doi:10.1136/jitc-2020-001403), 2020-10-19
Supplement: jitc-2020-001403supp001.pdf [file jitc-2020-001403supp001.pdf]

| <b>Institution</b>                                                 | <b>Department</b>                     |
|--------------------------------------------------------------------|---------------------------------------|
| St. Salvatore Hospital, University of L'Aquila, L'Aquila           | Medical Oncology                      |
| SS Annunziata Hospital, Chieti                                     | Medical Oncology                      |
| University Hospital of Parma, Parma                                | Medical Oncology                      |
| St. Camillo Forlanini Hospital, Rome                               | Pulmonary Oncology                    |
| University Hospital of Modena, Modena                              | Medical Oncology                      |
| S Maria Goretti Hospital, Latina                                   | Medical Oncology                      |
| St. Andrea Hospital, Rome                                          | Medical Oncology                      |
| Fondazione IRCCS Ca' Granda Ospedale Maggiore Policlinico, Milan   | Medical Oncology                      |
| Campus Bio-Medico University, Rome                                 | Medical Oncology                      |
| "Ospedali Riuniti" Hospital, Ancona                                | Medical Oncology                      |
| Policlinico Umberto I, Rome                                        | Medical Oncology                      |
| Clinical Cancer Centre "Giovanni Paolo II", Bari                   | Thoracic Oncology Unit                |
| Hospital of Fabriano, Fabriano                                     | Medical Oncology                      |
| "Augusto Murri" Hospital, Fermo                                    | Medical Oncology                      |
| St. Gerardo Hospital, Monza                                        | Medical Oncology                      |
| IRCCS – Istituto Nazionale Tumori, Fondazione "G. Pascale", Napoli | Medical Oncology                      |
| IRCCS Sacro Cuore Don Calabria, Negrar                             | Medical Oncology                      |
| University Hospital of Udine, Udine                                | Medical Oncology                      |
| ASST-Sette Laghi, Varese                                           | Medical Oncology                      |
| University Hospital "A.Gemelli", Rome                              | Comprehensive Cancer Center           |
| "Madre Teresa Di Calcutta" Hospital Padova Sud, Monselice          | Medical Oncology                      |
| Hospital of Macerata                                               | Medical Oncology                      |
| "F. Spaziani" Hospital, Frosinone                                  | Medical Oncology                      |
| "Careggi" University Hospital, Florence                            | Medical Oncology                      |
| AUSL Romagna, Ravenna                                              | Department of Oncology and Hematology |
| "Monaldi" Hospital, Naples                                         | Pneumo-Oncology Unit                  |
| Erasmus Medical Center, Rotterdam, the Netherlands                 | Department of Pulmonary Diseases      |
| "San Luigi-Gonzaga" University Hospital, Orbassano                 | Department of Oncology                |
| "Fondazione IRCCS Istituto Nazionale dei Tumori", Milan            | Department of Medical Oncology        |
| "Santa Maria della Misericordia" Hospital, Perugia                 | Medical Oncology                      |
| University Hospital of Geneva, Geneva                              | Medical Oncology                      |
| United Lincolnshire Hospital Trust, Lincoln                        | Medical Oncology                      |
| IRCCS, Policlinico San Martino, Genova                             | Medical Oncology                      |
| University Hospital of Foggia, Foggia                              | Medical Oncology                      |
