# Supplementary figures and images for: Baseline BMI and BMI variation during first line pembrolizumab in NSCLC patients with a PD-L1 expression ≥ 50%: a multicenter study with external validation
Source: PubMed Central journal article supplement — J Immunother Cancer. 2020 Oct 19;8(2):e001403. doi: 10.1136/jitc-2020-001403 (PMC7574933; doi:10.1136/jitc-2020-001403), 2020-10-19

Figure S2. Patient Flow Diagram.

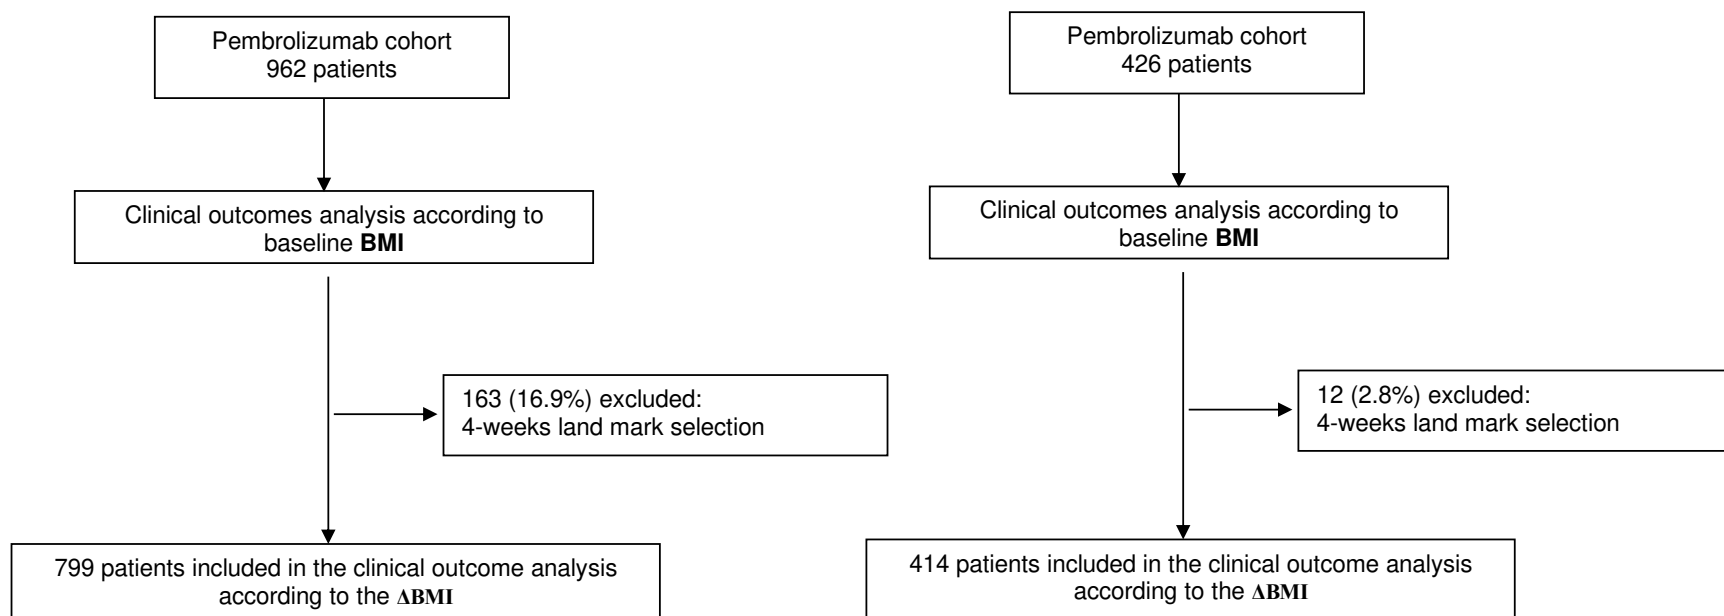

Supplement: jitc-2020-001403supp003.pdf [file jitc-2020-001403supp003.pdf]

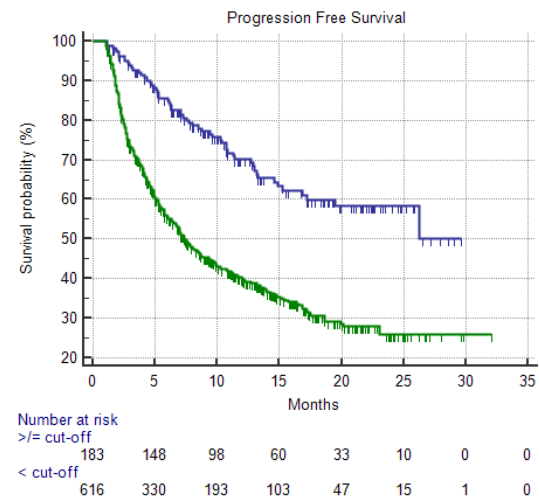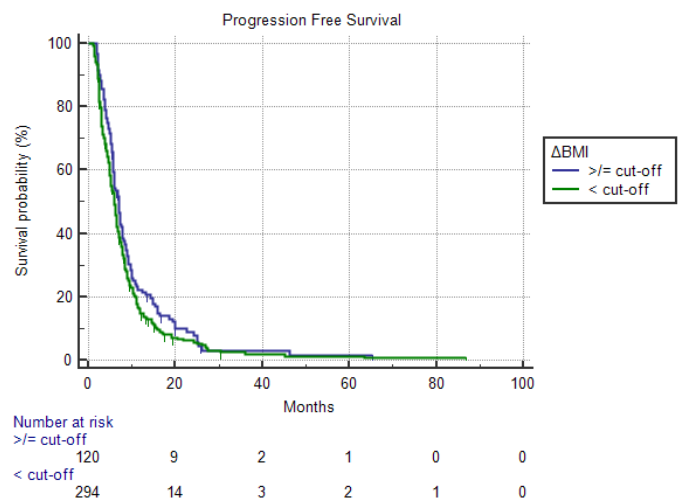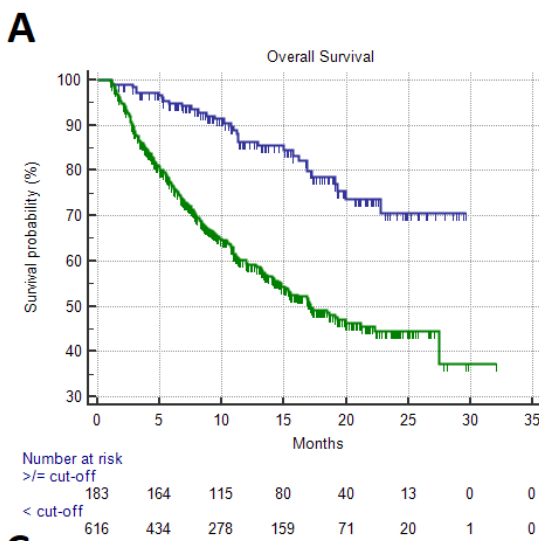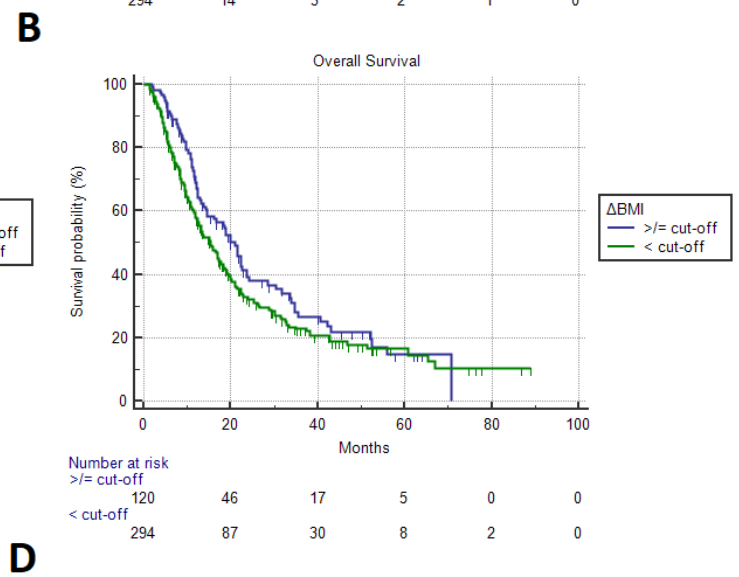

Supplement: jitc-2020-001403supp006.pdf [file jitc-2020-001403supp006.pdf]
